# Supplementary material for: Malignant Prostate Tissue Is Associated with Different Microbiome Gene Functions
Source: MDPI journal article supplement (doi:10.3390/diagnostics13020278), 2023-01-11
Supplement: s1 [file s1]

**Table S1.** Clinical characteristics of patients analyzed in this study

|                       | Prostate cancer (n=13) | BPH (n=10)  |
|-----------------------|------------------------|-------------|
| Age                   | 71.8±5.0               | 71.5±6.3    |
| Survival period (day) | 1780.3±46              | 530.5±524.4 |
| PSA                   | 13.2±5.5               | 2.9±2.6     |
| Gleason score         | 7.5±0.9                |             |
| Grade group           | 3.1±1.3                |             |
| Pathologic T stage    | T1 or T2               |             |

PSA: prostate specific antigen.
