# Supplementary material for: Malignant Prostate Tissue Is Associated with Different Microbiome Gene Functions
Source: MDPI journal article supplement (doi:10.3390/diagnostics13020278), 2023-01-11
Supplement: s1 [file s1]

**Table S2.** – Averaged taxonomic composition in malignant prostate cancer tissues (MT) and perimalignant prostate cancer benign prostatic tissues (BT) of prostate cancer patients.

| Taxon rank | Taxon name           | BT   |      |      |      |      |      |      | MT   |      |      |      |      |      |      |
|------------|----------------------|------|------|------|------|------|------|------|------|------|------|------|------|------|------|
|            |                      | Ave  | SD   | Min  | Max  | Q1   | Q2   | Q3   | Ave  | SD   | Min  | Max  | Q1   | Q2   | Q3   |
| Phylum     | Proteobacteria       | 45.5 | 22.4 | 18.5 | 90.0 | 29.9 | 39.1 | 67.5 | 43.2 | 17.2 | 18.9 | 79.5 | 30.4 | 39.1 | 63.9 |
|            | Actinobacteria       | 4.8  | 2.4  | 1.2  | 11.1 | 3.4  | 4.5  | 6.3  | 6.2  | 6.3  | 1.5  | 23.0 | 2.1  | 3.5  | 8.6  |
|            | Bacteroidetes        | 28.8 | 17.1 | 1.2  | 55.7 | 11.2 | 32.7 | 45.2 | 30.3 | 18.2 | 1.8  | 61.2 | 14.4 | 32.8 | 44.5 |
|            | Firmicutes           | 20.5 | 11.1 | 4.9  | 54.7 | 15.7 | 20.1 | 24.5 | 19.9 | 5.5  | 8.8  | 27.8 | 15.4 | 21.9 | 23.9 |
| Class      | Alphaproteobacteria  | 7.4  | 4.5  | 2.9  | 16.0 | 3.8  | 6.2  | 11.1 | 7.5  | 5.3  | 2.7  | 22.1 | 3.4  | 6.4  | 8.5  |
|            | Bacteroidia          | 28.1 | 17.4 | 0.7  | 55.3 | 10.2 | 32.2 | 44.9 | 29.8 | 18.4 | 1.0  | 60.7 | 13.6 | 32.3 | 44.4 |
|            | Bacilli              | 8.9  | 10.5 | 2.4  | 48.2 | 3.1  | 4.9  | 10.1 | 6.3  | 4.1  | 1.1  | 15.8 | 2.7  | 5.8  | 9.3  |
|            | Actinobacteria_c     | 4.8  | 2.4  | 1.2  | 11.1 | 3.4  | 4.5  | 6.3  | 6.2  | 6.3  | 1.5  | 23.0 | 2.1  | 3.5  | 8.5  |
|            | Gammaproteobacteria  | 16.8 | 8.6  | 6.7  | 44.5 | 10.5 | 15.6 | 24.4 | 17.0 | 9.3  | 5.4  | 50.3 | 10.8 | 16.5 | 21.8 |
|            | Betaproteobacteria   | 21.2 | 15.7 | 5.6  | 56.6 | 9.2  | 13.2 | 31.4 | 18.7 | 10.1 | 5.9  | 45.1 | 10.1 | 17.5 | 23.1 |
|            | Clostridia           | 11.4 | 6.5  | 0.5  | 21.6 | 5.2  | 12.6 | 16.8 | 13.3 | 7.1  | 1.0  | 22.6 | 7.6  | 15.6 | 18.9 |
| Order      | Pseudomonadales      | 10.7 | 8.2  | 3.4  | 42.5 | 5.9  | 8.9  | 12.2 | 9.2  | 4.8  | 2.1  | 17.0 | 4.6  | 10.2 | 13.4 |
|            | Bacteroidales        | 28.1 | 17.4 | 0.7  | 55.3 | 10.2 | 32.2 | 44.9 | 29.8 | 18.4 | 1.0  | 60.7 | 13.6 | 32.3 | 44.4 |
|            | Enterobacterales     | 2.4  | 2.1  | 0.4  | 9.3  | 1.2  | 1.5  | 2.9  | 3.0  | 4.6  | 0.4  | 20.2 | 0.8  | 1.3  | 2.5  |
|            | Burkholderiales      | 20.9 | 15.8 | 5.2  | 56.3 | 9.1  | 13.1 | 31.0 | 18.1 | 9.9  | 5.3  | 44.7 | 9.9  | 17.1 | 22.8 |
|            | Corynebacterales     | 2.3  | 1.5  | 0.6  | 6.8  | 1.4  | 1.7  | 3.1  | 3.4  | 4.7  | 0.6  | 18.1 | 0.8  | 1.4  | 4.9  |
|            | Clostridiales        | 11.4 | 6.5  | 0.5  | 21.5 | 5.0  | 12.6 | 16.7 | 13.3 | 7.1  | 1.0  | 22.4 | 7.6  | 15.6 | 18.9 |
|            | Sphingomonadales     | 1.1  | 1.6  | 0.1  | 7.6  | 0.3  | 0.6  | 0.9  | 0.9  | 1.6  | 0.1  | 6.4  | 0.3  | 0.4  | 0.6  |
|            | Propionibacterales   | 2.0  | 0.8  | 0.5  | 3.0  | 1.1  | 2.0  | 2.8  | 2.2  | 2.0  | 0.5  | 9.4  | 0.9  | 1.6  | 2.9  |
|            | Rhizobiales          | 5.8  | 4.0  | 2.0  | 14.7 | 2.6  | 4.7  | 6.7  | 5.4  | 3.4  | 2.2  | 13.7 | 2.4  | 4.6  | 6.8  |
|            | Bacillales           | 2.2  | 1.5  | 0.4  | 7.8  | 1.1  | 2.1  | 2.4  | 2.2  | 1.9  | 0.2  | 6.9  | 0.7  | 1.9  | 2.3  |
|            | Xanthomonadales      | 2.9  | 3.1  | 0.3  | 10.6 | 1.2  | 1.6  | 2.8  | 4.2  | 5.2  | 0.3  | 24.5 | 0.8  | 2.4  | 6.4  |
|            | Lactobacillales      | 6.7  | 9.7  | 1.4  | 46.0 | 2.0  | 3.4  | 7.3  | 4.1  | 2.5  | 0.9  | 9.0  | 1.9  | 3.7  | 6.3  |
| Family     | Muribaculaceae       | 23.8 | 15.1 | 0.3  | 45.1 | 9.1  | 23.1 | 39.7 | 25.6 | 16.1 | 0.4  | 52.7 | 12.2 | 27.9 | 38.1 |
|            | Staphylococcaceae    | 1.6  | 1.0  | 0.4  | 5.1  | 0.9  | 1.4  | 2.0  | 1.8  | 1.7  | 0.2  | 6.2  | 0.6  | 1.4  | 1.8  |
|            | Lawsonella_f         | 0.4  | 0.3  | 0.0  | 1.6  | 0.2  | 0.3  | 0.4  | 1.0  | 2.7  | 0.0  | 13.4 | 0.2  | 0.4  | 0.7  |
|            | Comamonadaceae       | 20.1 | 15.8 | 4.4  | 55.2 | 8.7  | 12.5 | 30.3 | 17.3 | 9.9  | 4.6  | 44.2 | 9.3  | 15.9 | 21.5 |
|            | Christensenellaceae  | 3.1  | 2.0  | 0.0  | 6.8  | 1.2  | 3.3  | 4.6  | 3.5  | 2.2  | 0.1  | 6.7  | 0.9  | 3.9  | 5.1  |
|            | Xanthomonadaceae     | 2.9  | 3.1  | 0.3  | 10.6 | 1.2  | 1.6  | 2.8  | 4.2  | 5.2  | 0.3  | 24.5 | 0.8  | 2.4  | 6.4  |
|            | Bacteroidaceae       | 2.7  | 2.0  | 0.0  | 8.1  | 1.1  | 2.8  | 4.2  | 3.0  | 2.1  | 0.2  | 7.0  | 0.7  | 2.8  | 4.6  |
|            | Streptococcaceae     | 3.1  | 4.1  | 0.6  | 19.9 | 1.0  | 2.1  | 3.1  | 2.7  | 2.1  | 0.5  | 7.7  | 0.8  | 1.8  | 4.1  |
|            | Prevotellaceae       | 1.4  | 1.6  | 0.1  | 6.4  | 0.3  | 0.9  | 1.8  | 1.1  | 1.2  | 0.1  | 5.4  | 0.5  | 0.7  | 1.2  |
|            | Bradyrhizobiaceae    | 5.1  | 4.0  | 1.3  | 14.5 | 2.4  | 3.6  | 5.5  | 5.0  | 3.5  | 1.4  | 13.5 | 2.1  | 4.4  | 6.6  |
|            | Sphingomonadaceae    | 1.1  | 1.6  | 0.1  | 7.6  | 0.3  | 0.5  | 0.8  | 0.9  | 1.6  | 0.1  | 6.3  | 0.2  | 0.4  | 0.6  |
|            | Propionibacteriaceae | 2.0  | 0.8  | 0.5  | 3.0  | 1.1  | 2.0  | 2.8  | 2.2  | 2.0  | 0.5  | 9.4  | 0.9  | 1.5  | 2.9  |
|            | Lachnospiraceae      | 2.1  | 1.1  | 0.2  | 4.5  | 1.2  | 2.1  | 2.9  | 2.4  | 1.2  | 0.0  | 4.2  | 1.7  | 2.7  | 3.3  |
|            | Pseudomonadaceae     | 1.6  | 2.1  | 0.3  | 10.2 | 0.8  | 1.0  | 1.6  | 1.8  | 2.5  | 0.2  | 12.0 | 0.7  | 1.3  | 1.6  |
|            | Yersiniaceae         | 2.2  | 2.1  | 0.3  | 9.1  | 1.2  | 1.5  | 2.5  | 2.8  | 4.5  | 0.3  | 19.7 | 0.5  | 1.2  | 2.1  |
|            | Corynebacteriaceae   | 1.8  | 1.4  | 0.4  | 5.8  | 0.9  | 1.2  | 2.6  | 1.7  | 1.8  | 0.3  | 6.6  | 0.5  | 0.8  | 2.1  |
|            | Ruminococcaceae      | 6.1  | 3.5  | 0.2  | 11.4 | 2.5  | 6.6  | 9.3  | 7.3  | 3.9  | 0.7  | 12.8 | 3.7  | 8.4  | 10.2 |
|            | Moraxellaceae        | 9.1  | 8.4  | 1.6  | 42.0 | 3.8  | 7.2  | 10.9 | 7.4  | 4.8  | 1.4  | 15.5 | 2.7  | 7.7  | 11.5 |
|            | Lactobacillaceae     | 2.3  | 7.7  | 0.1  | 37.2 | 0.2  | 0.4  | 1.0  | 0.6  | 0.6  | 0.0  | 2.5  | 0.2  | 0.5  | 0.7  |

|       |                        |      |      |     |      |     |      |      |      |      |     |      |     |      |      |
|-------|------------------------|------|------|-----|------|-----|------|------|------|------|-----|------|-----|------|------|
| Genus | Cutibacterium          | 2.0  | 0.8  | 0.5 | 3.0  | 1.1 | 2.0  | 2.8  | 2.2  | 2.0  | 0.5 | 9.4  | 0.9 | 1.5  | 2.9  |
|       | Stenotrophomonas       | 2.8  | 3.1  | 0.3 | 10.6 | 1.2 | 1.6  | 2.8  | 3.8  | 5.2  | 0.2 | 24.4 | 0.6 | 2.1  | 5.3  |
|       | Oscillibacter          | 2.0  | 1.4  | 0.0 | 5.3  | 0.7 | 2.0  | 2.9  | 2.3  | 1.3  | 0.2 | 3.9  | 0.7 | 2.4  | 3.6  |
|       | PAC000186_g            | 12.9 | 8.5  | 0.1 | 29.8 | 3.8 | 14.2 | 18.6 | 13.9 | 8.7  | 0.2 | 28.8 | 4.3 | 15.8 | 21.1 |
|       | Prevotella             | 1.3  | 1.6  | 0.0 | 6.0  | 0.3 | 0.8  | 1.8  | 1.1  | 1.1  | 0.1 | 5.0  | 0.5 | 0.7  | 1.2  |
|       | PAC001127_g            | 2.0  | 1.1  | 0.0 | 3.6  | 1.1 | 2.3  | 2.9  | 2.4  | 1.5  | 0.0 | 4.8  | 0.7 | 3.0  | 3.4  |
|       | Serratia               | 2.1  | 2.1  | 0.3 | 9.0  | 1.1 | 1.5  | 2.4  | 2.7  | 4.5  | 0.3 | 19.6 | 0.5 | 1.2  | 2.1  |
|       | Bacteroides            | 2.7  | 2.0  | 0.0 | 8.1  | 1.1 | 2.8  | 4.2  | 3.0  | 2.1  | 0.2 | 7.0  | 0.7 | 2.8  | 4.6  |
|       | Christensenellaceae_uc | 0.8  | 0.7  | 0.0 | 2.6  | 0.1 | 0.7  | 1.2  | 0.9  | 0.6  | 0.0 | 2.2  | 0.1 | 1.0  | 1.2  |
|       | Streptococcus          | 2.9  | 4.0  | 0.6 | 19.9 | 1.0 | 1.8  | 2.8  | 2.6  | 2.1  | 0.5 | 7.6  | 0.8 | 1.8  | 3.9  |
|       | Corynebacterium        | 1.8  | 1.4  | 0.4 | 5.7  | 0.9 | 1.1  | 2.4  | 1.6  | 1.7  | 0.3 | 6.4  | 0.5 | 0.8  | 2.1  |
|       | Pseudoflavonifractor   | 3.0  | 1.9  | 0.1 | 6.1  | 1.2 | 3.1  | 4.6  | 3.7  | 2.3  | 0.1 | 8.4  | 1.4 | 4.4  | 5.1  |
|       | Lawsonella             | 0.4  | 0.3  | 0.0 | 1.6  | 0.2 | 0.3  | 0.4  | 1.0  | 2.7  | 0.0 | 13.4 | 0.2 | 0.4  | 0.7  |
|       | PAC001360_g            | 1.2  | 0.8  | 0.0 | 2.7  | 0.5 | 1.4  | 1.9  | 1.4  | 1.0  | 0.0 | 3.1  | 0.5 | 1.8  | 2.2  |
|       | PAC001066_g            | 3.0  | 2.1  | 0.0 | 8.4  | 1.1 | 3.3  | 4.5  | 3.7  | 2.3  | 0.1 | 8.3  | 1.2 | 4.2  | 5.3  |
|       | Afipia                 | 1.0  | 0.9  | 0.0 | 3.2  | 0.5 | 0.7  | 1.3  | 1.1  | 0.9  | 0.2 | 3.5  | 0.4 | 0.7  | 1.3  |
|       | PAC001068_g            | 2.2  | 2.9  | 0.0 | 10.0 | 0.2 | 1.2  | 2.4  | 2.1  | 3.0  | 0.0 | 11.6 | 0.6 | 1.4  | 2.1  |
|       | Pelomonas              | 19.8 | 15.8 | 4.4 | 54.9 | 8.6 | 12.0 | 29.9 | 16.5 | 10.0 | 4.5 | 44.2 | 9.0 | 14.2 | 20.4 |
|       | Enhydrobacter          | 8.1  | 8.4  | 1.1 | 41.0 | 2.9 | 7.0  | 9.5  | 6.6  | 5.0  | 0.8 | 14.8 | 1.4 | 6.9  | 11.1 |
|       | Bradyrhizobium         | 4.1  | 3.1  | 1.3 | 11.2 | 1.8 | 2.7  | 4.3  | 3.9  | 2.7  | 1.1 | 10.7 | 1.6 | 3.2  | 5.1  |
|       | Pseudomonas            | 1.5  | 2.1  | 0.3 | 10.1 | 0.5 | 0.9  | 1.6  | 1.8  | 2.5  | 0.2 | 11.8 | 0.7 | 1.2  | 1.5  |
|       | Sphingomonas           | 1.0  | 1.6  | 0.1 | 7.6  | 0.2 | 0.5  | 0.8  | 0.8  | 1.5  | 0.1 | 6.2  | 0.2 | 0.3  | 0.6  |
|       | Pediococcus            | 1.2  | 4.8  | 0.0 | 23.3 | 0.0 | 0.1  | 0.1  | 0.1  | 0.3  | 0.0 | 1.3  | 0.0 | 0.1  | 0.1  |

Relative abundances less than 1 % were expressed as ETC. Wilcoxon signed-rank test was used to analyze the significance between the two groups. Ave, average; SD, standard deviation; Min, minimum; Max, maximum; Q1, first quartile; Q2: median; Q3, third quartile.

**Table S3.** – Averaged taxonomic composition in tumor regions (MT) of prostate cancer patients and benign prostate hyperplasia (BPH).

| Taxon rank | Taxon name               | MT   |      |      |      |      |      |      | BPH  |     |      |      |      |      |      |
|------------|--------------------------|------|------|------|------|------|------|------|------|-----|------|------|------|------|------|
|            |                          | Ave  | SD   | Min  | Max  | Q1   | Q2   | Q3   | Ave  | SD  | Min  | Max  | Q1   | Q2   | Q3   |
| Phylum     | Proteobacteria***        | 41.5 | 16.9 | 18.9 | 79.5 | 30.0 | 37.9 | 58.0 | 11.3 | 3.4 | 4.8  | 18.2 | 9.3  | 12.0 | 12.3 |
|            | Actinobacteria**         | 6.0  | 6.0  | 1.5  | 23.0 | 2.2  | 3.5  | 6.7  | 1.5  | 1.8 | 0.3  | 5.3  | 0.4  | 0.6  | 2.1  |
|            | Bacteroidetes**          | 31.8 | 17.8 | 1.8  | 61.2 | 14.5 | 33.5 | 44.5 | 41.7 | 8.1 | 25.8 | 56.5 | 37.6 | 42.1 | 46.5 |
|            | Firmicutes***            | 20.3 | 5.4  | 8.8  | 27.8 | 15.5 | 22.2 | 23.9 | 40.9 | 5.3 | 34.4 | 49.1 | 35.9 | 40.4 | 44.7 |
|            | Deferribacteres***       | 0.0  | 0.1  | 0.0  | 0.1  | 0.0  | 0.0  | 0.1  | 2.3  | 1.1 | 0.1  | 3.4  | 1.9  | 2.7  | 3.1  |
|            | Tenericutes***           | 0.1  | 0.1  | 0.0  | 0.2  | 0.0  | 0.1  | 0.1  | 2.1  | 1.2 | 0.0  | 3.1  | 0.5  | 2.8  | 3.0  |
| Class      | Alphaproteobacteria***   | 7.3  | 5.0  | 2.7  | 22.1 | 4.0  | 6.2  | 8.3  | 0.2  | 0.2 | 0.0  | 0.6  | 0.0  | 0.1  | 0.2  |
|            | Bacteroidia**            | 31.3 | 18.1 | 1.0  | 60.7 | 13.8 | 32.9 | 44.4 | 41.5 | 8.3 | 25.1 | 56.5 | 37.5 | 42.0 | 46.4 |
|            | Bacilli*                 | 6.6  | 4.5  | 1.1  | 18.2 | 3.4  | 5.5  | 9.5  | 3.3  | 3.7 | 0.1  | 12.0 | 0.6  | 2.1  | 5.0  |
|            | Actinobacteria c**       | 6.0  | 5.9  | 1.5  | 23.0 | 2.2  | 3.5  | 6.7  | 1.2  | 1.6 | 0.2  | 5.0  | 0.3  | 0.5  | 1.7  |
|            | Gammaproteobacteria***   | 16.0 | 9.3  | 4.1  | 50.3 | 10.3 | 13.9 | 21.1 | 2.2  | 3.1 | 0.3  | 8.3  | 0.5  | 0.6  | 3.2  |
|            | Betaproteobacteria***    | 18.2 | 9.7  | 5.9  | 45.1 | 10.6 | 16.7 | 22.4 | 1.5  | 3.1 | 0.1  | 10.0 | 0.1  | 0.2  | 1.4  |
|            | Clostridia***            | 13.5 | 6.9  | 1.0  | 22.6 | 8.1  | 15.2 | 18.9 | 37.4 | 3.3 | 33.8 | 42.6 | 34.7 | 36.1 | 41.5 |
|            | Mollicutes***            | 0.1  | 0.1  | 0.0  | 0.2  | 0.0  | 0.1  | 0.1  | 2.1  | 1.2 | 0.0  | 3.1  | 0.5  | 2.8  | 3.0  |
|            | Deferribacteres c***     | 0.0  | 0.1  | 0.0  | 0.1  | 0.0  | 0.0  | 0.1  | 2.3  | 1.1 | 0.1  | 3.4  | 1.9  | 2.7  | 3.1  |
|            | Epsilonproteobacteria*** | 0.0  | 0.0  | 0.0  | 0.2  | 0.0  | 0.0  | 0.0  | 7.2  | 4.0 | 0.1  | 11.4 | 3.5  | 8.3  | 9.9  |
| Order      | Pseudomonadales***       | 8.8  | 5.0  | 1.8  | 17.0 | 3.9  | 9.9  | 13.0 | 0.3  | 0.4 | 0.0  | 1.4  | 0.1  | 0.2  | 0.4  |
|            | Bacteroidales**          | 31.3 | 18.1 | 1.0  | 60.7 | 13.8 | 32.9 | 44.4 | 41.5 | 8.3 | 25.1 | 56.5 | 37.5 | 42.0 | 46.4 |
|            | Enterobacteriales*       | 2.8  | 4.4  | 0.3  | 20.2 | 0.8  | 1.3  | 2.4  | 1.5  | 2.1 | 0.3  | 6.2  | 0.4  | 0.5  | 2.0  |
|            | Burkholderiales***       | 17.7 | 9.5  | 5.3  | 44.7 | 10.4 | 16.5 | 22.2 | 0.4  | 0.7 | 0.1  | 2.1  | 0.1  | 0.1  | 0.5  |
|            | Corynebacteriales***     | 3.1  | 4.5  | 0.6  | 18.1 | 0.8  | 1.4  | 3.0  | 0.2  | 0.3 | 0.0  | 0.7  | 0.0  | 0.1  | 0.3  |
|            | Clostridiales***         | 13.5 | 6.9  | 1.0  | 22.4 | 8.1  | 15.2 | 18.9 | 37.4 | 3.3 | 33.8 | 42.6 | 34.7 | 36.1 | 41.5 |
|            | Sphingomonadales***      | 0.8  | 1.5  | 0.1  | 6.4  | 0.3  | 0.4  | 0.6  | 0.0  | 0.1 | 0.0  | 0.3  | 0.0  | 0.0  | 0.0  |
|            | Propionibacteriales***   | 2.2  | 1.9  | 0.5  | 9.4  | 1.0  | 1.7  | 2.9  | 0.3  | 0.3 | 0.0  | 1.0  | 0.1  | 0.2  | 0.4  |
|            | Rhizobiales***           | 5.3  | 3.2  | 2.2  | 13.7 | 2.6  | 4.7  | 6.7  | 0.0  | 0.1 | 0.0  | 0.2  | 0.0  | 0.0  | 0.1  |
|            | Bacillales***            | 2.1  | 1.8  | 0.2  | 6.9  | 0.8  | 2.0  | 2.3  | 0.1  | 0.1 | 0.0  | 0.3  | 0.0  | 0.1  | 0.3  |
|            | Xanthomonadales***       | 3.9  | 5.0  | 0.3  | 24.5 | 0.8  | 2.3  | 5.7  | 0.1  | 0.2 | 0.0  | 0.5  | 0.0  | 0.0  | 0.1  |
|            | Lactobacillales          | 4.5  | 3.3  | 0.9  | 15.8 | 2.4  | 3.4  | 6.3  | 3.2  | 3.6 | 0.1  | 11.7 | 0.6  | 2.0  | 4.8  |
|            | Neisseriales             | 0.5  | 0.6  | 0.0  | 2.4  | 0.1  | 0.4  | 0.6  | 1.0  | 2.4 | 0.0  | 7.8  | 0.0  | 0.1  | 0.9  |
|            | Deferribacteriales***    | 0.0  | 0.1  | 0.0  | 0.1  | 0.0  | 0.0  | 0.1  | 2.3  | 1.1 | 0.1  | 3.4  | 1.9  | 2.7  | 3.1  |
|            | Acholeplasmatales***     | 0.0  | 0.1  | 0.0  | 0.2  | 0.0  | 0.0  | 0.1  | 2.1  | 1.2 | 0.0  | 3.1  | 0.5  | 2.8  | 3.0  |
|            | Campylobacteriales***    | 0.0  | 0.0  | 0.0  | 0.2  | 0.0  | 0.0  | 0.0  | 7.2  | 4.0 | 0.1  | 11.4 | 3.5  | 8.3  | 9.9  |
| Family     | Muribaculaceae*          | 26.8 | 15.8 | 0.4  | 52.7 | 12.3 | 27.9 | 38.5 | 11.3 | 4.9 | 1.6  | 15.2 | 8.2  | 13.5 | 14.9 |
|            | Staphylococcaceae***     | 1.7  | 1.6  | 0.2  | 6.2  | 0.6  | 1.4  | 1.8  | 0.0  | 0.0 | 0.0  | 0.1  | 0.0  | 0.0  | 0.0  |
|            | Lawsonella f***          | 0.9  | 2.6  | 0.0  | 13.4 | 0.1  | 0.4  | 0.7  | 0.0  | 0.0 | 0.0  | 0.1  | 0.0  | 0.0  | 0.1  |
|            | Comamonadaceae***        | 16.4 | 9.7  | 4.6  | 44.2 | 9.2  | 14.2 | 20.7 | 0.2  | 0.3 | 0.0  | 0.8  | 0.0  | 0.1  | 0.2  |
|            | Christensenellaceae*     | 3.6  | 2.1  | 0.1  | 6.7  | 1.7  | 3.9  | 5.1  | 5.1  | 2.4 | 0.2  | 7.2  | 4.1  | 5.9  | 6.6  |
|            | Xanthomonadaceae***      | 3.9  | 5.0  | 0.3  | 24.5 | 0.8  | 2.3  | 5.7  | 0.1  | 0.2 | 0.0  | 0.5  | 0.0  | 0.0  | 0.1  |
|            | Bacteroidaceae*          | 3.0  | 2.0  | 0.2  | 7.0  | 1.5  | 2.9  | 4.5  | 6.4  | 5.5 | 2.4  | 18.1 | 3.1  | 4.2  | 8.4  |
|            | Streptococcaceae*        | 3.1  | 3.1  | 0.5  | 14.7 | 1.3  | 1.9  | 4.1  | 1.3  | 2.4 | 0.0  | 7.6  | 0.1  | 0.1  | 2.2  |
|            | Prevotellaceae*          | 1.3  | 1.4  | 0.1  | 5.4  | 0.5  | 0.8  | 1.8  | 2.5  | 1.1 | 0.4  | 4.1  | 2.0  | 2.4  | 3.4  |
|            | Bradyrhizobiaceae***     | 4.9  | 3.3  | 1.4  | 13.5 | 2.2  | 4.5  | 6.2  | 0.0  | 0.0 | 0.0  | 0.1  | 0.0  | 0.0  | 0.0  |
|            | Sphingomonadaceae***     | 0.8  | 1.5  | 0.1  | 6.3  | 0.2  | 0.4  | 0.6  | 0.0  | 0.1 | 0.0  | 0.3  | 0.0  | 0.0  | 0.0  |
|            | Propionibacteriaceae***  | 2.2  | 1.9  | 0.5  | 9.4  | 0.9  | 1.6  | 2.9  | 0.3  | 0.3 | 0.0  | 1.0  | 0.1  | 0.2  | 0.4  |
|            | Lachnospiraceae***       | 2.4  | 1.2  | 0.0  | 4.2  | 1.7  | 2.7  | 3.3  | 17.0 | 2.3 | 13.8 | 21.0 | 15.4 | 16.4 | 19.0 |
|            | Pseudomonadaceae***      | 1.7  | 2.4  | 0.2  | 12.0 | 0.6  | 1.0  | 1.5  | 0.0  | 0.0 | 0.0  | 0.1  | 0.0  | 0.0  | 0.0  |
|            | Yersiniaceae***          | 2.5  | 4.3  | 0.3  | 19.7 | 0.5  | 1.2  | 2.0  | 0.1  | 0.3 | 0.0  | 1.1  | 0.0  | 0.0  | 0.0  |
|            | Corynebacteriaceae***    | 1.6  | 1.7  | 0.3  | 6.6  | 0.5  | 0.8  | 2.0  | 0.1  | 0.2 | 0.0  | 0.6  | 0.0  | 0.1  | 0.1  |
|            | Ruminococcaceae***       | 7.4  | 3.7  | 0.7  | 12.8 | 4.7  | 8.4  | 10.2 | 15.0 | 1.9 | 12.5 | 18.4 | 13.5 | 14.7 | 16.6 |
|            | Moraxellaceae***         | 7.1  | 4.9  | 1.4  | 15.5 | 2.1  | 7.3  | 11.6 | 0.3  | 0.4 | 0.0  | 1.3  | 0.0  | 0.1  | 0.4  |
|            | Odoribacteraceae***      | 0.0  | 0.0  | 0.0  | 0.0  | 0.0  | 0.0  | 0.0  | 2.3  | 1.0 | 0.5  | 3.6  | 1.2  | 2.6  | 3.2  |
|            | AC160630 f***            | 0.0  | 0.0  | 0.0  | 0.0  | 0.0  | 0.0  | 0.0  | 11.7 | 8.6 | 1.2  | 31.9 | 6.2  | 10.9 | 14.9 |
|            | Neisseriaceae            | 0.5  | 0.6  | 0.0  | 2.4  | 0.1  | 0.4  | 0.6  | 1.0  | 2.4 | 0.0  | 7.8  | 0.0  | 0.1  | 0.9  |
|            | Rikenellaceae***         | 0.0  | 0.0  | 0.0  | 0.1  | 0.0  | 0.0  | 0.0  | 6.2  | 2.5 | 1.0  | 8.0  | 5.1  | 7.4  | 7.8  |
|            | Acholeplasmataceae***    | 0.0  | 0.1  | 0.0  | 0.2  | 0.0  | 0.0  | 0.1  | 2.1  | 1.2 | 0.0  | 3.1  | 0.5  | 2.8  | 3.0  |
|            | Deferribacteraceae***    | 0.0  | 0.1  | 0.0  | 0.1  | 0.0  | 0.0  | 0.1  | 2.3  | 1.1 | 0.1  | 3.4  | 1.9  | 2.7  | 3.1  |
|            | Helicobacteraceae***     | 0.0  | 0.0  | 0.0  | 0.0  | 0.0  | 0.0  | 0.0  | 7.2  | 4.0 | 0.0  | 11.4 | 3.5  | 8.3  | 9.9  |
|            | Lactobacillaceae*        | 0.5  | 0.6  | 0.0  | 2.5  | 0.2  | 0.5  | 0.7  | 1.4  | 1.2 | 0.1  | 3.8  | 0.5  | 1.1  | 2.2  |
| Genus      | Cutibacterium***         | 2.2  | 1.9  | 0.5  | 9.4  | 0.9  | 1.6  | 2.9  | 0.2  | 0.3 | 0.0  | 1.0  | 0.1  | 0.2  | 0.3  |
|            | Stenotrophomonas***      | 3.5  | 5.0  | 0.2  | 24.4 | 0.6  | 2.0  | 4.6  | 0.0  | 0.0 | 0.0  | 0.1  | 0.0  | 0.0  | 0.0  |
|            | Oscillibacter***         | 2.4  | 1.3  | 0.2  | 3.9  | 1.2  | 2.6  | 3.5  | 6.0  | 2.3 | 1.8  | 8.7  | 5.3  | 6.8  | 7.1  |
|            | PAC000186 g**            | 14.3 | 8.2  | 0.2  | 28.8 | 7.2  | 16.0 | 19.4 | 1.8  | 0.7 | 0.4  | 2.4  | 1.3  | 2.0  | 2.3  |
|            | Prevotella*              | 1.3  | 1.3  | 0.1  | 5.0  | 0.5  | 0.8  | 1.8  | 0.6  | 0.5 | 0.1  | 2.0  | 0.3  | 0.4  | 0.6  |
|            | PAC001127 g**            | 2.4  | 1.4  | 0.0  | 4.8  | 0.7  | 2.9  | 3.3  | 0.3  | 0.2 | 0.0  | 0.5  | 0.3  | 0.4  | 0.4  |
|            | Serratia***              | 2.5  | 4.2  | 0.2  | 19.6 | 0.5  | 1.2  | 2.0  | 0.1  | 0.3 | 0.0  | 1.1  | 0.0  | 0.0  | 0.0  |
|            | Bacteroides*             | 3.0  | 2.0  | 0.2  | 7.0  | 1.5  | 2.9  | 4.5  | 6.4  | 5.5 | 2.4  | 18.1 | 3.1  | 4.2  | 8.4  |
|            | Christensenellaceae uc** | 1.0  | 0.6  | 0.0  | 2.2  | 0.3  | 1.0  | 1.3  | 0.3  | 0.2 | 0.0  | 0.6  | 0.1  | 0.3  | 0.5  |
|            | Streptococcus*           | 3.0  | 3.1  | 0.5  | 14.7 | 1.3  | 1.9  | 4.0  | 1.3  | 2.4 | 0.0  | 7.5  | 0.1  | 0.1  | 2.2  |
|            | Corynebacterium***       | 1.6  | 1.6  | 0.3  | 6.4  | 0.5  | 0.8  | 1.9  | 0.1  | 0.2 | 0.0  | 0.6  | 0.0  | 0.1  | 0.1  |

|                       |      |     |     |      |     |      |      |      |     |     |      |     |      |      |
|-----------------------|------|-----|-----|------|-----|------|------|------|-----|-----|------|-----|------|------|
| Pseudoflavonifractor* | 3.7  | 2.1 | 0.1 | 8.4  | 1.6 | 4.3  | 5.0  | 2.6  | 1.1 | 0.6 | 3.7  | 1.6 | 3.0  | 3.4  |
| Lawsonella***         | 0.9  | 2.6 | 0.0 | 13.4 | 0.1 | 0.4  | 0.7  | 0.0  | 0.0 | 0.0 | 0.1  | 0.0 | 0.0  | 0.1  |
| PAC001360 g*          | 1.4  | 1.0 | 0.0 | 3.1  | 0.6 | 1.6  | 2.2  | 2.2  | 1.1 | 0.1 | 3.8  | 1.8 | 2.5  | 2.7  |
| PAC001066 g**         | 3.8  | 2.2 | 0.1 | 8.3  | 1.7 | 4.2  | 5.1  | 1.5  | 0.8 | 0.0 | 2.2  | 1.1 | 1.8  | 2.1  |
| Afipia***             | 1.1  | 0.8 | 0.2 | 3.5  | 0.4 | 0.9  | 1.2  | 0.0  | 0.0 | 0.0 | 0.0  | 0.0 | 0.0  | 0.0  |
| PAC001068 g           | 2.5  | 3.2 | 0.0 | 11.6 | 0.6 | 1.4  | 2.6  | 1.6  | 0.8 | 0.1 | 2.5  | 0.7 | 2.0  | 2.2  |
| Pelomonas***          | 15.6 | 9.7 | 4.5 | 44.2 | 9.0 | 12.2 | 20.0 | 0.1  | 0.2 | 0.0 | 0.5  | 0.0 | 0.1  | 0.1  |
| Enhydrobacter***      | 6.4  | 5.0 | 0.8 | 14.8 | 1.4 | 6.1  | 11.1 | 0.2  | 0.3 | 0.0 | 1.1  | 0.0 | 0.1  | 0.3  |
| Bradyrhizobium***     | 3.9  | 2.5 | 1.1 | 10.7 | 1.8 | 3.4  | 5.0  | 0.0  | 0.0 | 0.0 | 0.0  | 0.0 | 0.0  | 0.0  |
| PAC002482 g***        | 0.0  | 0.0 | 0.0 | 0.0  | 0.0 | 0.0  | 0.0  | 11.6 | 8.7 | 0.5 | 31.9 | 6.1 | 10.8 | 14.9 |
| PAC001141 g**         | 0.4  | 0.3 | 0.0 | 0.9  | 0.1 | 0.6  | 0.7  | 1.7  | 1.0 | 0.0 | 2.8  | 0.5 | 2.1  | 2.6  |
| Helicobacter***       | 0.0  | 0.0 | 0.0 | 0.0  | 0.0 | 0.0  | 0.0  | 7.2  | 4.0 | 0.0 | 11.4 | 3.5 | 8.3  | 9.9  |
| Odoribacter***        | 0.0  | 0.0 | 0.0 | 0.0  | 0.0 | 0.0  | 0.0  | 2.2  | 1.1 | 0.3 | 3.6  | 1.2 | 2.6  | 3.2  |
| Alistipes***          | 0.0  | 0.0 | 0.0 | 0.1  | 0.0 | 0.0  | 0.0  | 5.9  | 2.3 | 1.0 | 7.6  | 4.8 | 6.8  | 7.3  |
| Acholeplasma g2***    | 0.0  | 0.1 | 0.0 | 0.2  | 0.0 | 0.0  | 0.1  | 2.1  | 1.2 | 0.0 | 3.1  | 0.5 | 2.8  | 3.0  |
| Mucispirillum***      | 0.0  | 0.1 | 0.0 | 0.1  | 0.0 | 0.0  | 0.1  | 2.3  | 1.1 | 0.1 | 3.4  | 1.9 | 2.7  | 3.1  |
| PAC001091 g***        | 0.0  | 0.1 | 0.0 | 0.2  | 0.0 | 0.0  | 0.1  | 2.7  | 1.3 | 0.4 | 4.1  | 2.0 | 2.8  | 3.8  |
| Neisseria             | 0.4  | 0.4 | 0.0 | 2.0  | 0.1 | 0.2  | 0.4  | 1.0  | 2.3 | 0.0 | 7.5  | 0.0 | 0.1  | 0.9  |
| Lactobacillus**       | 0.4  | 0.4 | 0.0 | 1.3  | 0.2 | 0.3  | 0.6  | 1.4  | 1.2 | 0.1 | 3.8  | 0.5 | 1.1  | 2.2  |
| Faecalibacterium***   | 0.0  | 0.0 | 0.0 | 0.1  | 0.0 | 0.0  | 0.0  | 2.6  | 3.4 | 0.5 | 9.1  | 0.8 | 1.0  | 3.8  |

Relative abundances less than 1 % were expressed as ETC. Wilcoxon rank-sum test was used to analyze the significance between the two groups (\*,  $p < 0.05$ ; \*\*,  $p < 0.01$ ; \*\*\*,  $p < 0.001$ ). Ave, average; SD, standard deviation; Min, minimum; Max, maximum; Q1, first quartile; Q2: median; Q3, third quartile.
